# Supplementary material for: Forest dynamics in the U.S. indicate disproportionate attrition in western forests, rural areas and public lands
Source: PLoS One. 2017 Feb 22;12(2):e0171383. doi: 10.1371/journal.pone.0171383 (PMC5321268; doi:10.1371/journal.pone.0171383)
Supplement: S1 Table — (XLSX) [file pone.0171383.s004.xlsx]

## Sheet: Sheet1
Ecoregion Number	Ecoregion Name	Ecoregion Area (km2)		Forest Cover in 1990 (% of total Ecoregion Area)	Forest Cover in 2000 (% of total Ecoregion Area)	Forest Attrition Distance (FAD) in 1990 (m)	FAD in 2000 (m)	FAD Change 1990-2000 (%)	FAD Change Simulated Mean (%)	FAD Change Simulated Mean + 3*STD (%)	FAD Change Simulated Mean / STD
*1	Coast Range	52925		92.3	90.3	30.9598	41.7644	34.899	20.5463	21.1937	66.5123
*2	Puget Lowland	15380		69.4	65.5	149.765	202.554	35.248	9.90536	11.2257	57.5842
3	Willamette Valley	14877		39.9	37.7	764.885	846.676	10.6931	2.03041	3.0298	26.0041
*4	Cascades	46420		93.8	92.7	33.9881	42.49	25.0142	10.7488	11.284	79.9696
*5	Sierra Nevada	52739		80.1	78.7	144.882	162.981	12.4919	5.56658	6.7728	17.224
6	California Coastal Sage, Chaparral, and Oak Woodlands	99620		28.5	27.7	1806.12	2080.6	15.1972	0.564007	0.730142	264.242
7	Central California Valley	45958		0.5	0.4	16054.1	17375.5	8.23083	0.0749934	0.158023	294.683
8	Southern California Mountains	17882		47.1	46.2	672.021	759.213	12.9746	0.960456	1.34553	93.5981
*9	Eastern Cascades Slopes and Foothills	56186		70.7	68.6	265.037	369.454	39.397	3.85454	4.38005	202.904
10	Columbia Plateau	83120		5.1	4.8	6099.1	6537.72	7.19153	0.232061	0.328985	215.408
11	Blue Mountains	70934		55.2	53.4	692.68	930.453	34.3266	1.52711	1.99197	211.673
12	Snake River Plain	53633		1.6	1.5	17085.5	17492.2	2.38037	0.0315116	0.139698	65.1339
13	Central Basin and Range	309940		17.7	16.9	5059.18	6911.95	36.622	0.153961	0.245839	1190.76
14	Mojave Basin and Range	129591		3.5	3.4	13123	15770.5	20.1744	0.00412195	0.0670893	960.987
*15	Northern Rockies	81953		85.6	84.4	97.1317	114.212	17.5845	4.25538	4.65256	100.678
16	Idaho Batholith	60282		83.6	81.3	89.4673	101.678	13.6484	12.7607	13.9239	2.28954
17	Middle Rockies	164458		59.6	59.1	488.685	575.966	17.8605	0.899682	1.10067	253.162
18	Wyoming Basin	132665		4.7	3.9	6019.98	7028.56	16.7538	0.444993	0.578588	366.229
*19	Wasatch and Uinta Mountains	45696		80.1	79.6	125.234	152.831	22.0355	1.93619	2.22968	205.454
20	Colorado Plateaus	134921		39	37	1904.38	2225.5	16.862	1.15651	1.40508	189.55
*21	Southern Rockies	145711		74.7	73.5	193.96	255.576	31.7669	3.54986	4.02846	176.875
22	Arizona/New Mexico Plateau	150076		16.7	16.2	3906.08	5828.05	49.2044	0.245872	0.354394	1353.42
*23	Arizona/New Mexico Mountains	108818		64.3	63.8	643.125	769.581	19.6627	0.644966	0.835266	299.806
24	Chihuahuan Deserts	161462		1.8	1.7	19865.4	23074.8	16.1557	0.0506265	0.10504	887.934
25	High Plains	288289		1.1	1	18626.5	18963.8	1.81056	0.0464239	0.110312	82.8391
26	Southwestern Tablelands	198862		6.2	6.2	8706.27	9019.08	3.59287	-0.0412868	-0.0179885	467.95
27	Central Great Plains	274974		6.6	6.6	2725.8	2742.93	0.628454	0.166971	0.205145	36.2669
28	Flint Hills	27940		13.4	13.7	790.222	804.258	1.77614	0.223778	0.310736	53.5553
29	Cross Timbers	88146		49.6	47.4	232.595	272.677	17.2326	5.18	5.97831	45.2932
30	Edwards Plateau	74969		34	32.5	2297.23	2318.96	0.945782	0.516107	0.790534	4.69715
31	Southern Texas Plains	53102		2.8	2.7	5002.82	5196.6	3.87337	0.322321	0.440538	90.1155
32	Texas Blackland Prairies	43379		28.1	22.5	429.218	571.631	33.1798	15.8578	17.685	28.4401
33	East Central Texas Plains	55766		42.4	40.5	463.251	492.083	6.22379	3.69061	4.26933	13.1315
34	Western Gulf Coastal Plain	73350		8.5	7.6	2789.66	4192.46	50.2855	0.880249	1.1737	505.078
*35	South Central Plains	152135		72.8	67.9	158.37	207.092	30.7648	14.2224	15.2633	47.6793
36	Ouachita Mountains	26878		93.7	92.3	21.8814	26.6368	21.7323	19.8645	20.3907	10.649
37	Arkansas Valley	28437		70.9	68.3	109.271	124.15	13.6166	8.80357	9.40021	24.2005
38	Boston Mountains	14171		93.6	92.4	19.1304	22.876	19.5794	17.9079	18.2258	15.7746
39	Ozark Highlands	106396		82.2	80.2	63.0562	71.918	14.0539	10.8536	11.4066	17.3628
40	Central Irregular Plains	114365		32.9	31.9	348.44	375.769	7.84328	2.59497	3.05563	34.1795
41	Canadian Rockies	18891		89.1	88.8	37.848	39.1409	3.41598	2.51936	2.69324	15.4699
42	Northwestern Glaciated Plains	175160		1.5	1.5	8521.53	10206.1	19.7685	-0.054347	0.00570593	990.269
43	Northwestern Great Plains	357573		8.5	8.1	3867.33	4612.86	19.2776	0.09481	0.200167	546.22
44	Nebraska Sand Hills	59136		0.8	0.8	6993.75	7005.02	0.161109	0.0539774	0.0667167	25.2286
45	Piedmont	166097		88	84.7	38.0255	50.2677	32.1947	28.2351	28.7606	22.605
46	Northern Glaciated Plains	134670		2.1	2.2	2617.46	2617.76	0.0117805	0.215269	0.22817	-47.3207
47	Western Corn Belt Plains	228194		10	9.8	1364.07	1389.67	1.87628	0.547436	0.596773	80.8023
48	Lake Agassiz Plain	45053		7.5	7.6	1064.93	1067.81	0.270063	0.15217	0.202197	7.06979
49	Northern Minnesota Wetlands	22780		49.2	49.3	766.271	779.923	1.78161	0.642125	0.861589	15.5763
50	Northern Lakes and Forests	181323		81.1	80.4	86.9569	93.6814	7.73318	5.15911	5.38428	34.2947
51	North Central Hardwood Forests	88127		49.5	47.9	220.066	236.409	7.42622	4.46147	5.06214	14.8071
52	Driftless Area	47395		50.3	49.9	291.137	298.167	2.41453	1.07858	1.27881	20.0162
53	Southeastern Wisconsin Till Plains	31198		22.1	22.4	506.42	510.229	0.752032	0.436401	0.515315	11.9991
54	Central Corn Belt Plains	76617		12.8	12.5	1463.7	1491.34	1.88842	0.538504	0.647967	36.9967
55	Eastern Corn Belt Plains	83530		27.2	26.9	411.825	418.639	1.65461	1.02282	1.13483	16.9208
56	Southern Michigan/Northern Indiana Drift Plains	71738		39	38.3	292.335	303.17	3.70638	2.32736	2.56533	17.3848
57	Huron/Erie Lake Plains	24507		18.8	18.9	618.643	622.115	0.561107	0.294847	0.413515	6.7312
58	Northeastern Highlands	126832		93.3	92.4	23.6993	27.159	14.5981	13.4203	13.6262	17.158
59	Northeastern Coastal Zone	34095		75.8	73.7	114.831	126.841	10.4589	6.18436	6.81327	20.39
60	Northern Allegheny Plateau	31147		83.3	80.5	49.98	59.7023	19.4525	16.756	17.0787	25.0706
61	Erie Drift Plain	31061		66.2	63.8	117.966	133.467	13.1408	8.62397	9.21078	23.0918
62	North Central Appalachians	29181		95.7	95	12.4118	14.6445	17.9883	16.1987	16.3708	31.198
63	Middle Atlantic Coastal Plain	73958		55.8	51.8	269.044	305.17	13.4277	10.1969	11.655	6.64745
64	Northern Piedmont	30406		53.2	52.2	232.036	246.423	6.20053	2.11832	2.47675	34.168
65	Southeastern Plains	328355		74.7	70.8	91.7773	118.501	29.1184	20.0159	20.9739	28.5024
66	Blue Ridge	46613		96.2	95.4	11.1695	14.1965	27.1008	24.0246	24.2332	44.239
67	Ridge and Valley	115493		78.2	76.4	79.93	90.0446	12.6543	8.35414	8.87529	24.754
68	Southwestern Appalachians	37992		89.6	86.3	31.2937	42.3627	35.3712	34.6777	35.7113	2.01301
69	Central Appalachians	62058		96.7	95.4	9.44998	14.2025	50.2909	49.9893	51.4755	0.60873
70	Western Allegheny Plateau	81440		90	88.9	31.5003	36.2218	14.9888	11.6206	11.837	46.6872
71	Interior Plateau	123568		72.5	71	99.6079	109.584	10.0158	6.06105	6.54962	24.2841
72	Interior River Valleys and Hills	120359		46.9	45.8	317.02	344.267	8.59484	1.96708	2.46717	39.7596
73	Mississippi Alluvial Plain	113020		4.1	4.3	5584.49	5607.74	0.4162	0.132755	0.183475	16.765
74	Mississippi Valley Loess Plains	51802		59.2	56.6	201.593	250.681	24.3504	7.05114	8.34526	40.1026
75	Southern Coastal Plain	136540		46.7	41.7	576.247	616.298	6.95019	6.78342	8.16596	0.361886
76	Southern Florida Coastal Plain	21538		2.8	2.8	8457.55	8887.87	5.08809	0.0316983	0.0973634	231.008
77	North Cascades	30427		83.5	82.3	75.3317	80.9731	7.48875	14.4834	19.7335	-3.99685
*78	Klamath Mountains/California High North Coast Range	48528		85.5	84.6	73.8575	93.4173	26.4832	4.56399	4.96315	164.738
79	Madrean Archipelago	42564		12.5	12.5	4770.95	5289.6	10.8709	0.0825578	0.158253	427.571
80	Northern Basin and Range	142208		7.4	7	6946.92	7646.07	10.0643	0.117456	0.202841	349.485
81	Sonoran Basin and Range	116761		0.6	0.5	22154.6	29241.6	31.989	0.101973	0.2474	657.797
82	Acadian Plains and Hills	44210		88.7	87	39.4596	46.0771	16.7701	13.932	14.2463	27.0863
83	Eastern Great Lakes Lowlands	57015		58.5	56.4	189.275	204.991	8.30353	4.68481	5.16456	22.6286
84	Atlantic Coastal Pine Barrens	14581		58.9	57.3	292.8	309.544	5.71866	2.58752	3.2259	14.7144

## Sheet: Sheet2
0		13.7
0		13.9
14.1965	13.7	14.5
14.2025	13.9	22.8
14.6445	14.5	26.1
22.876	22.8	26.7
26.6368	26.1	35.6
27.159	26.7	39
36.2218	35.6	41.1
39.1409	39	41.7
41.7644	41.1	41.7
42.3627	41.7	45.3
42.49	41.7	49.3
46.0771	45.3	59.5
50.2677	49.3	71.2
59.7023	59.5	80.7
71.918	71.2	88.9
80.9731	80.7	90.5
90.0446	88.9	92.9
93.4173	90.5	101.2
93.6814	92.9	108.1
101.678	101.2	112
109.584	108.1	113.2
114.212	112	122.5
118.501	113.2	126.3
124.15	122.5	131.7
126.841	126.3	151.6
133.467	131.7	162
152.831	151.6	202
162.981	162	202.1
202.554	202	203.7
204.991	202.1	233.4
207.092	203.7	244.2
236.409	233.4	245.1
246.423	244.2	254.1
250.681	245.1	270.3
255.576	254.1	292.5
272.677	270.3	296
298.167	292.5	300.5
303.17	296	308.7
305.17	300.5	341.7
309.544	308.7	368.5
344.267	341.7	369.4
369.454	368.5	413.9
375.769	369.4	470.5
418.639	413.9	502
492.083	470.5	561.1
510.229	502	572.3
571.631	561.1	603
575.966	572.3	620
616.298	603	757.8
622.115	620	765.5
759.213	757.8	771.5
769.581	765.5	790.4
779.923	771.5	845.9
804.258	790.4	922.5
846.676	845.9	1064.7
930.453	922.5	1390.2
1067.81	1064.7	1487.6
1389.67	1390.2	2076.6
1491.34	1487.6	2217.4
2080.6	2076.6	2314.5
2225.5	2217.4	2616.8
2318.96	2314.5	2685.6
2617.76	2616.8	4156.9
2742.93	2685.6	4572.7
4192.46	4156.9	5127.7
4612.86	4572.7	5255.5
5196.6	5127.7	5419
5289.6	5255.5	5817.8
5607.74	5419	6399.6
5828.05	5817.8	6874.8
6537.72	6399.6	6905
6911.95	6874.8	6936.2
7005.02	6905	7581.8
7028.56	6936.2	8757.6
7646.07	7581.8	8886.5
8887.87	8757.6	10099.4
9019.08	8886.5	15715.5
10206.1	10099.4	17364.3
15770.5	15715.5	17448
17375.5	17364.3	18567.2
17492.2	17448	22751.6
18963.8	18567.2	29226.6
23074.8	22751.6
29241.6	29226.6
